# Supplementary material for: Axotrophin/MARCH7 acts as an E3 ubiquitin ligase and ubiquitinates tau protein in vitro impairing microtubule binding
Source: PubMed Central journal article supplement (PMC4311138; doi:10.1016/j.bbadis.2014.05.029), 2014-09
Supplement: mmc1.pdf [file mmc1.pdf]

Q9H992 MARH7\_HUMAN MESKPSRIPRRISVQPSSS--LSARMMSGG-----RGSLLNDTYHSRDSFFRLDSEYQS-----TSASASASPFQSAWYSESEITQGARSRSONQQRDHD 88  
H2QIV6 H2QIV6\_PANTR MESKPSRIPRRISVQPSSS--LSARMMSGG-----RGSLLNDTYHSRDSFFRLDSEYQS-----TSASASASPFQSAWYSESEITQGARSRSONQQRDHD 88  
F7E884 F7E884\_CALJA MESKPSRIPRRISVQPSSS--LSARMMSGG-----RGSLLNDTYHSRDSFFRLDSEYQS-----TSASASASPFQSTWYSESEITQGARSRSONQQRDHD 88  
G1SEZ6 G1SEZ6\_RABIT MESKPSRIPRRISVQPSSS--LSARMMSGG-----RGSFFNDAYHSRDSFFRLDSEYQV-----TSASASASPFQSTWYSESEITQGARSRSONQQRDHD 88  
Q9WV66 MARH7\_MOUSE MESKPSRIPRRISVQPSGS--LSTRMVSNGN-----RGTSLNDYHSRDSFFRLDSEYQS-----ASASACASPCQAWYSESEITQGARARACTQQRDHD 88  
F7EQU7 F7EQU7\_MONDO MESKPSRIPRRITVEPSSSLARTVSGG-----RGSGMNDAYHPRESPPFLNLSHESNLLHTSGRDWGFGEREHAETPWKFTSSSPAHFSGTIFERFPWGSFLGSRSLAHSLSLTPFQSAWYSESEITQGARPRLONQQRDHD 141  
E1C485 E1C485\_CHICK MESKPSRIPRRISVQAPSSITLGSRTLTG-----NSLAGAYGARDSSRLDSEYQESDVLSSDRDWGIGEREHENPWKLTSSSTHYSGLLDHPRSGRFLG--TRNRLSTSSSHPTFCYDDESERTOGAYSRLLHSQQDSD 136  
F1RAT0 F1RAT0\_DANRE MDSKRRRPFPAVSSSSLSLSPSLSSSSSSALSASRLYGRGCVLGRDRFSDASVKLDSDYQGSRLSSPRVYSSITSRHEN-----WKLSTPVTSSSSSSSCDRSWLSSSGDRARLIDSRRLGTYCGLLTSQDSE 134  
H3CVR1 H3CVR1\_TETNG -----

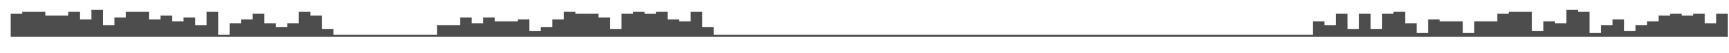

Q9H992 MARH7\_HUMAN SKRPKLSCTNCT--TSAGRNVGNGLNLTLS--DSSWRH-----SQVPRSSSMVLGSGFGTDLMRERRDLERRTDSISINLMDYSHRSGDFTTSSYVQDRVPS--YSQGARPKENSMSTLQLNTSSTN--HQLPSEHOTILSSRD--SRNSLR--SN 225  
H2QIV6 H2QIV6\_PANTR SKRPKLSCTNCT--TSAGRNVGNGLNLTLS--DSSWRH-----SQVPRSSSMVLGSGFGTDLMRERRDLERRTDSISINLMDYSHRSGDFTTSSYVQDRVPS--YSQGARPKENSMSTLQLNTSSTN--HQLPSEHOTILSSRD--SRNSLR--SN 225  
F7E884 F7E884\_CALJA SKRPKLSCTNCT--TSAGRNVGNGLNLTLS--DSSWRH-----SQVPRSSSMVLGSGFGTDLMRERRDLERRTDSISINLMDYSHRSGDFTTSSYVQDRVPS--YSQGARPKENSMSTLQLNTSSTN--HQLPSEHOTILSSRD--SRNSLR--SN 225  
G1SEZ6 G1SEZ6\_RABIT SKRPKLSCTNCT--TSAGRNVGNGLNLTLS--DSSWRH-----SQVPRSSSMVLGSGFGTDLMRERRDLERRTDSISINLMDYSHRSGDFTTSSYVQDRVPS--YSQGARPKENSMSTLQLNTSSTN--HQLPSEHOTILSSRD--SRNSLR--SN 229  
Q9WV66 MARH7\_MOUSE SKRPKLSCTNCASTSAGRNNGSGLNLTIS--DSSWRH-----SQVPRSSSMVLGSGFGTDLMRERRDLERRTDSISINLMDYSHRSGDFTTSSYVQDRVPS--YSQGARPKENAVSTLQLNTSSTN--HQLPSEHOTVPSYRDSRSTR--SH 228  
F7EQU7 F7EQU7\_MONDO SKRPKLSCTNCT--TSAGRNNGSGLNLTIS--DSSWRH-----SQVPRSSSMVLGSGFGTDLMRERRDLERRTDSISINLMDYSHRSGDFTTSSYVQDRVPS--YSQGARPKENAVSTLQLNTSSTN--HQLPSEHOTVPSYRDSRSTR--SH 280  
E1C485 E1C485\_CHICK SKRPKLSCTNCT--TSAGRNNGSGLNLTIS--DSSWRH-----SQVPRSSSMVLGSGFGTDLMRERRDLERRTDSISINLMDYSHRSGDFTTSSYVQDRVPS--YSQGARPKENAVSTLQLNTSSTN--HQLPSEHOTVPSYRDSRSTR--SH 269  
F1RAT0 F1RAT0\_DANRE SKRAKLSYTNREVVRSRSTSKPATSYSTLGSWKSISIPLSR-----SRIPRSMVMFGLGTLVREERLEL--IDQSFNNLVDSHYRNSDFSSAYFDPRPASTYAEAGARPKENLSALRLN--ASMN--HQLPSEHOTVPSYRDSRSTR--TS 282  
H3CVR1 H3CVR1\_TETNG SKRAKLSYTNREVVRSRSTSKPATSYSTLGSWKSISIPLSR-----SRIPRSMVMFGLGTLVREERLEL--IDQSFNNLVDSHYRNSDFSSAYFDPRPASTYAEAGARPKENLSALRLN--ASMN--HQLPSEHOTVPSYRDSRSTR--TS 86

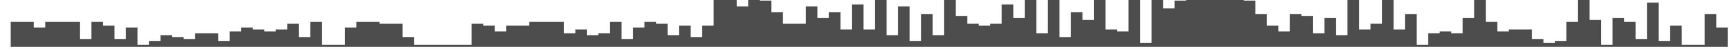

Q9H992 MARH7\_HUMAN FSSR-----ESESRS-----NTQPGFSYSSSRDEAPIISNSERVVSSQRPFOE--SSDNEGRRTTRRLLSRIASSMSSTFFSRRSSQDSLNTSRSLNSNSYVSPRILLTASQSRSNVPSASEVDPNRAEASQGFRLRRRWGLSSLSH 362  
H2QIV6 H2QIV6\_PANTR FSSR-----ESESRS-----NTQPGFSYSSSRDEAPIISNSERVVSSQRPFOE--SSDNEGRRTTRRLLSRIASSMSSTFFSRRSSQDSLNTSRSLNSNSYVSPRILLTASQSRSNVPSASEVDPNRAEASQGFRLRRRWGLSSLSH 362  
F7E884 F7E884\_CALJA FSSR-----ESESRS-----NTQPGFSYSSSRDEAPIISNSERVVSSQRPFOE--SSDNEGRRTTRRLLSRIASSMSSTFFSRRSSQDSLNTSRSLNSNSYVSPRILLTASQSRSNVPSASEVDPNRAEASQGFRLRRRWGLSSLSH 362  
G1SEZ6 G1SEZ6\_RABIT FSSR-----ESESRS-----NTQPGFSYSSSRDEAPIISNSERVVSSQRPFOE--SSDNEGRRTTRRLLSRIASSMSSTFFSRRSSQDSLNTSRSLNSNSYVSPRILLTASQSRSNVPSASEVDPNRAEASQGFRLRRRWGLSSLSH 366  
Q9WV66 MARH7\_MOUSE FSSR-----ESESRS-----NTQPGFSYSSSRDEAPIISNSERVVSSQRPFOE--SSDNEGRRTTRRLLSRIASSMSSTFFSRRSSQDSLNTSRSLNSNSYVSPRILLTASQSRSNVPSASEVDPNRAEASQGFRLRRRWGLSSLSH 363  
F7EQU7 F7EQU7\_MONDO FSSR-----ESESRS-----NTQPGFSYSSSRDEAPIISNSERVVSSQRPFOE--SSDNEGRRTTRRLLSRIASSMSSTFFSRRSSQDSLNTSRSLNSNSYVSPRILLTASQSRSNVPSASEVDPNRAEASQGFRLRRRWGLSSLSH 418  
E1C485 E1C485\_CHICK YSSRRRRNEIESPOR-----NIHPAFSHSTTRGETSSSS--SERVSSQSLNDA--AADTEGRRTRQLLSRLASSMSSTFFSRRSSQDSLNTSRSLNSNSYVSPRILLTASQSRSNVPSASEVDPNRAEASQGFRLRRRWGLSGVQ 410  
F1RAT0 F1RAT0\_DANRE LFPRDTP--RSSSTRSTSTVSDTSHHSSWSTPTYTALACTSPSPSIPAPTPPLAQNTEGSDGRGTRRLLSR-----LFSRRSSQDSLNTSRSLNSNSYVSPRILLTASQSRSNVPSASEVDPNRAEASQGFRLRRRWGLSGVQ 423  
H3CVR1 H3CVR1\_TETNG LRPP-----PDQQR-----YHTSPVTPRPLRPRTSSHYAADTALPPRPGPE--GGESDGTSTRRLLSR-----LFSRRSSQDSLNTSRSLNSNSYVSPRILLTASQSRSNVPSASEVDPNRAEASQGFRLRRRWGLSGVQ 212

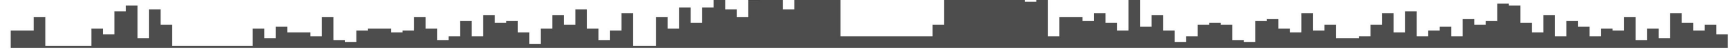

Q9H992 MARH7\_HUMAN NHSSSESDSENFQOESRGRNTGWLSSSLRNRCPLFRRRRREGRDESSRIPTSDTSSRS--HIFRRRESNEVVHLEAQNPLGAAANRPOASAAASSATGGSTSDSAQGGRRNTGISGILPGSLFRFAVPPALGSLNLDNVMITVDIIPSGW 511  
H2QIV6 H2QIV6\_PANTR NHSSSESDSENFQOESRGRNTGWLSSSLRNRCPLFRRRRREGRDESSRIPTSDTSSRS--HIFRRRESNEVVHLEAQNPLGAAANRPOASAAASSATGGSTSDSAQGGRRNTGIAGILPGSLFRFAVPPALGSLNLDNVMITVDIIPSGW 511  
F7E884 F7E884\_CALJA NHSSSESDSENFQOESRGRNTGWLSSSLRNRCPLFRRRRREGRDESSRIPTSDTSSRS--HIFRRRESNEVVHLEAQNPLGAAANRPOASAAASSATGGSTSDSAQGGRRNTGIAGILPGSLFRFAVPPALGSLNLDNVMITVDIIPSGW 511  
G1SEZ6 G1SEZ6\_RABIT NHSSSESDSENFQOESRGRNTGWLSSSLRNRCPLFRRRRREGRDESSRIPTSDTSSRS--HIFRRRESNEVVHLEAQNPLGAAANRPOASAAASSATGGSTSDSAQGGRRNTGIAGILPGSLFRFAVPPALGSLNLDNVMITVDIIPSGW 515  
Q9WV66 MARH7\_MOUSE NHSSSESDSENFQOESRGRNTGWLSSSLRNRCPLFRRRRREGRDESSRIPTSDTSSRS--HIFRRRESNEVVHLEAQNPLGAAANRPOASAAASSATGGSTSDSAQGGRRNTGIAGILPGSLFRFAVPPALGSLNLDNVMITVDIIPSGW 512  
F7EQU7 F7EQU7\_MONDO NPNETGSENFQOESRGRNTGWLSSSLRNRCPLFRRRRREGRDESSRIPTSDTSSRS--HIFRRRESNEVVHLEAQNPLGAAANRPOASAAASSATGGSTSDSAQGGRRNTGIAGILPGSLFRFAVPPALGSLNLDNVMITVDIIPSGW 568  
E1C485 E1C485\_CHICK SLNLDSDGESVYRDESSRNTGWLSSSLRNRCPLFRRRRREGRDESSRIPTSDTSSRS--HIFRRRESNEVVHLEAQNPLGAAANRPOASAAASSATGGSTSDSAQGGRRNTGIAGILPGSLFRFAVPPALGSLNLDNVMITVDIIPSGW 502  
F1RAT0 F1RAT0\_DANRE VQES--TDVPEQESLPPAGLSWLN--WNRCPLFRRRRREGRDESSRIPTSDTSSRS--HIFRRRESNEVVHLEAQNPLGAAANRPOASAAASSATGGSTSDSAQGGRRNTGIAGILPGSLFRFAVPPALGSLNLDNVMITVDIIPSGW 560  
H3CVR1 H3CVR1\_TETNG YRSGSTQAGPASRRPEPGATSSWLSLRLRERCPLLRRLRHRARDEQRSSGSSPDDE-----EEEEKEEGAVGLGAFNGGSPR-----LGDEVRPDVAEESPRRRRVGVCNTEAFPRFLV 325

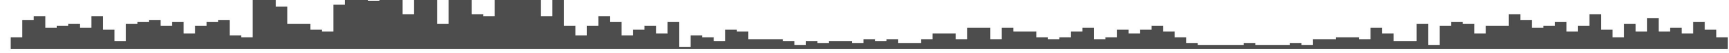

Q9H992 MARH7\_HUMAN N---SADGK--SDKTKSAPSRDPERLQKIKESLLEDSE--EEEGDLCRICMAAASSNLLIEPCKCTGSLQVYHQDCMKKWLQAKINSGSSLEAVTTCELCKEKLELNLDFDIHELHRAHANEQ--AEYEFISSGLYLVLVLLHLCEQSF 654  
H2QIV6 H2QIV6\_PANTR N---SADGK--SDKTKSAPSRDPERLQKIKESLLEDSE--EEEGDLCRICMAAASSNLLIEPCKCTGSLQVYHQDCMKKWLQAKINSGSSLEAVTTCELCKEKLELNLDFDIHELHRAHANEQ--AEYEFISSGLYLVLVLLHLCEQSF 654  
F7E884 F7E884\_CALJA N---SADGK--SDKTKSAPSRDPERLQKIKESLLEDSE--EEEGDLCRICMAAASSNLLIEPCKCTGSLQVYHQDCMKKWLQAKINSGSSLEAVTTCELCKEKLELNLDFDIHELHRAHANEQ--AEYEFISSGLYLVLVLLHLCEQSF 654  
G1SEZ6 G1SEZ6\_RABIT N---SADGK--SDKTKSAPSRDPERLQKIKESLLEDSE--EEEGDLCRICMAAASSNLLIEPCKCTGSLQVYHQDCMKKWLQAKINSGSSLEAVTTCELCKEKLELNLDFDIHELHRAHANEQ--AEYEFISSGLYLVLVLLHLCEQSF 658  
Q9WV66 MARH7\_MOUSE N---STDGQ--NDKAKSAPSRDPERLQKIKESLLEDSE--DEEGDLCRICMAAASSNLLIEPCKCTGSLQVYHQDCMKKWLQAKINSGSSLEAVTTCELCKEKLELNLDFDIHELHRAHANEQ--AEYEFISSGLYLVLVLLHLCEQSF 656  
F7EQU7 F7EQU7\_MONDO N---SDGQ--NDKTKLPLSRDPERLQKIKESLLEDSE--DEEGDLCRICMAAASSNLLIEPCKCTGSLQVYHQDCMKKWLQAKINSGSSLEAVTTCELCKEKLELNLDFDIHELHRAHANEQ--AEYEFISSGLYLVLVLLHLCEQSF 776  
E1C485 E1C485\_CHICK S---QSDGQESDKSKIPSRDPERLQKIKESLLEDSE--DEEGDLCRICMAAASSNLLIEPCKCTGSLQVYHQDCMKKWLQAKINSGSSLEAVTTCELCKEKLELNLDFDIHELHRAHANEQ--ADYEFISSGLYLVLVLLHLCEQSF 646  
F1RAT0 F1RAT0\_DANRE GVEGRSQADEQPKDKPAPSRDPERLQKIKESLLEDSE--DEEGDLCRICMAAASSNLLIEPCKCTGSLQVYHQDCMKKWLQAKINSGSSLEAVTTCELCKEKLELNLDFDIHELHRAHANEQ--ADYEFISSGLYLVLVLLHLCEQSF 705  
H3CVR1 H3CVR1\_TETNG G--GAEKQTDQEETDASNNQEKLRRIKERLLEDSE--DEEGDMCRICMAGEDASNPLIQPCRCTGSLQVYHQDCIKRWLCSKISSANLEAITTCELCKEKLELNLDFDIHELHRAHANEQ--ADYEFISSGLYLVLVLLHLCEQSF 472

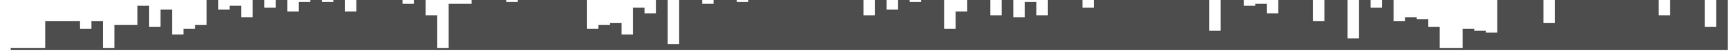

Q9H992 MARH7\_HUMAN SDMMGNTNEPSTRVFINLARLQAHMEDLETSEDDSEEDGDHNRTFDIA----- 704  
H2QIV6 H2QIV6\_PANTR SDMMGNTNEPSTRVFINLARLQAHMEDLETSEDDSEEDGDHNRTFDIA----- 704  
F7E884 F7E884\_CALJA SDMMGNTNEPSTRVFINLARLQAHMEDLETSEDDSEEDGDHNRTFDIA----- 704  
G1SEZ6 G1SEZ6\_RABIT SDMMGNTNEPSTRVFINLARLQAHMEDLETSEDESEEDGDHNRTFDIA----- 708  
Q9WV66 MARH7\_MOUSE SDMMGNTIEPSTRVFINLARLQAHMEDLETSEDEF----- 693  
F7EQU7 F7EQU7\_MONDO SDMLGTASEASTRVFINLARLQAHMEDLETSEDESEEDGDHNRDFDMA----- 776  
E1C485 E1C485\_CHICK SDMLGTASEASTRVFINLARLQAHMEDLETSEDDSE----- 685  
F1RAT0 F1RAT0\_DANRE SDVLGAVNDAG----FFNLARLQAHMEDNLESSYAESEDEVEDSRPSIDFCDELEDDDEEEEEEEV 768  
H3CVR1 H3CVR1\_TETNG SDVLGAVDAG----LNVLRILQAHMEDNLESMFLF----- 505

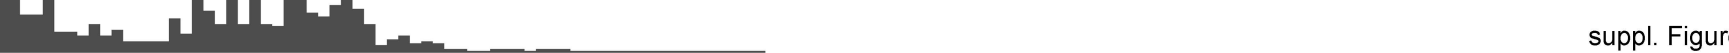

suppl. Figure 1

|            |   |   |   |   |   |   |
|------------|---|---|---|---|---|---|
| Mg-ATP     | + | + | + | + | + | + |
| E1         | + | + | + | + | + | + |
| E2 UbcH5c  | + | + | + | + | - | - |
| E3 AxoRing | + | + | + | + | + | + |
| Ub         | + | + | m | m | + | + |

|               |    |    |    |    |    |    |
|---------------|----|----|----|----|----|----|
| Substrate Tau | 0N | 2N | 0N | 2N | 0N | 2N |
|               | 4R | 3R | 4R | 3R | 4R | 3R |

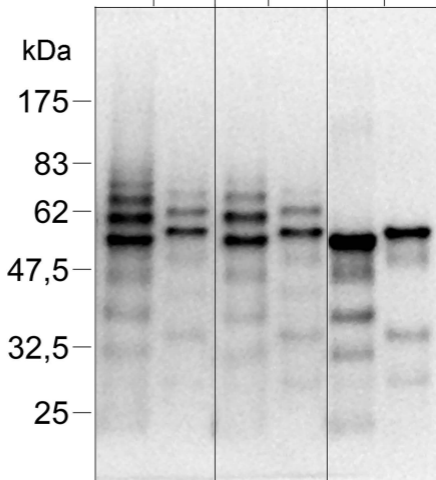

blot: a-tau

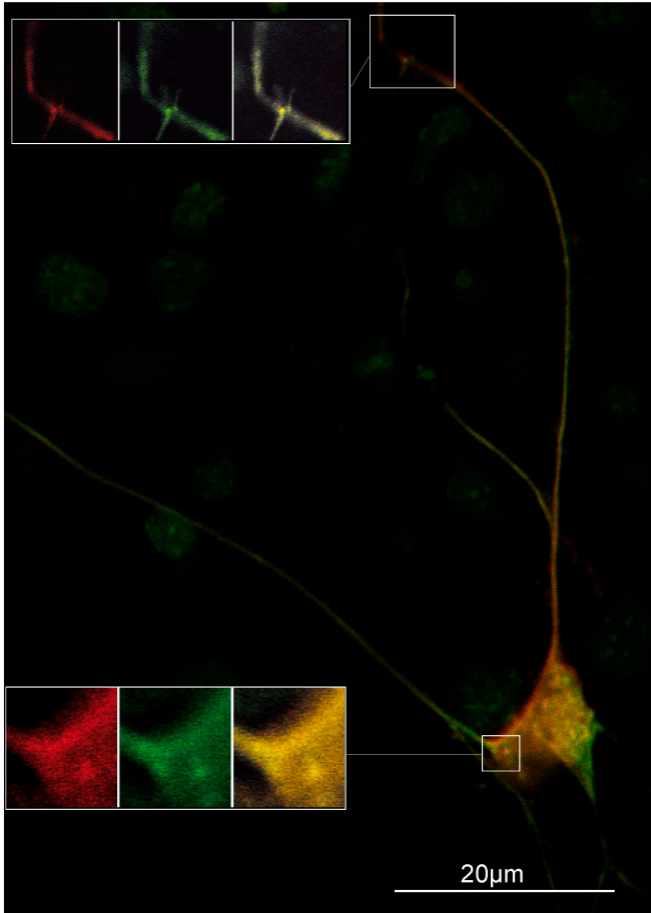

suppl. Figure 3
